# Supplementary material for: Differential Expression and Diagnostic Value of MUC5AC Glycoforms in Pancreatic Ductal Adenocarcinoma
Source: MDPI journal article supplement (doi:10.3390/cancers15194832), 2023-10-02
Supplement: s1 [file s1]

## Differential Expression and Diagnostic Value of MUC5AC Glycoforms in Pancreatic Ductal Adenocarcinoma

### Supplementary Tables

**Supplementary Table S1: Location-wise expression pattern of mature MUC5AC in association with immature isoform in the primary tumors.**

| Location of MM expression | Stage I/II/III | IM-positive | IM-negative | Total |
|---------------------------|----------------|-------------|-------------|-------|
| Ap                        | 3/8/0          | 9           | 2           | 11    |
| Cy                        | 5/10/0         | 14          | 1           | 15    |
| Ec                        | 3/6/0          | 9           | 0           | 9     |
| Ap + Cy                   | 2/6/0          | 7           | 1           | 8     |
| Ap + EC                   | 2/4/0          | 6           | 0           | 6     |
| Cy+ Ec                    | 2/6/0          | 8           | 0           | 8     |

MM - mature MUC5AC, IM – immature MUC5AC, Ap – apical expression, Cy- cytoplasmic expression, Ec – extracellular expression.

**Supplementary Table S2: Stage-wise breakdown of MUC5AC glycoform expression in primary tumors of the tested tissue microarray**

|                                        | N  | MM ± IM                      | MM-positive | MM-only | IM-only | MM + IM | IM-positive                  | All negative |
|----------------------------------------|----|------------------------------|-------------|---------|---------|---------|------------------------------|--------------|
| Stage I                                | 14 | 8                            | 6           | 0       | 2       | 6       | 8                            | 6            |
| Stage II                               | 22 | 19                           | 12          | 2       | 7       | 10      | 17                           | 3            |
| Stage III                              | 2  | 0                            | 0           | 0       | 0       | 0       | 0                            | 2            |
| Total                                  | 38 | 27                           | 18          | 2       | 9       | 16      | 25                           | 11           |
| Stage I-II vs III-IV (%) (p-value)     | NS | 65 vs 35 (p=0.02)            | NS          | NS      | NS      | NS      | 60% vs 40% (p=0.006)         | NS           |
| Stage I vs II vs III (%)               | NS | 57 vs 86 vs 0 (p=0.01)       | NS          | NS      | NS      | NS      | NS                           | NS           |
| Stage I vs. II vs. III vs. IV (%)      | NS | 57 vs 86 vs 0 vs 25 (p=0.04) | NS          | NS      | NS      | NS      | 57 vs 77 vs 0 vs 25 (p=0.02) | NS           |
| G 1-2 differentiation                  | 22 | 18                           | 13          | 2       | 3       | 11      | 16                           | 4            |
| G3, undifferentiated and adenosquamous | 16 | 9                            | 5           | 0       | 4       | 5       | 8                            | 7            |
| N0 disease                             | 30 | 20                           | 13          | 1       | 7       | 12      | 19                           | 10           |
| N1 disease                             | 8  | 7                            | 5           | 1       | 4       | 2       | 6                            | 1            |
| T-T2                                   | 18 | 12                           | 9           | 1       | 3       | 8       | 11                           | 6            |
| T3-T4 disease                          | 20 | 14                           | 9           | 1       | 7       | 8       | 14                           | 5            |

MM - mature MUC5AC, IM – immature MUC5AC, G- grade. NS- not significantly different (p> 0.05)
